# Supplementary material
Source: PubMed Central journal article supplement (PMC2483365)
Supplement: tpc.108.059220_1.pdf [file tpc.108.059220_1.pdf]

Supplemental Data Zhao et al. (2008). Two distinct, interacting classes of nuclear envelope-associated coiled-coil proteins are required for the tissue-specific nuclear envelope targeting of Arabidopsis RanGAP.

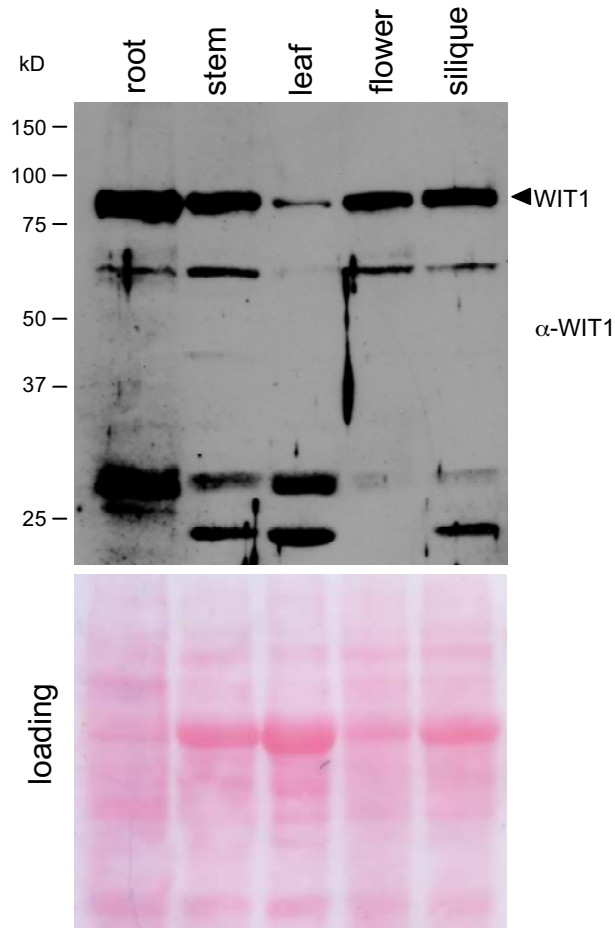

**Supplemental Figure 1. WIT1 is Expressed Ubiquitously in Arabidopsis.**

Protein extracts from roots, stems, rosette leaves, flowers and green siliques of wild-type Arabidopsis (ecotype Columbia) were probed with the anti-WIT1 antibody. Ponceau S staining is shown as loading control.

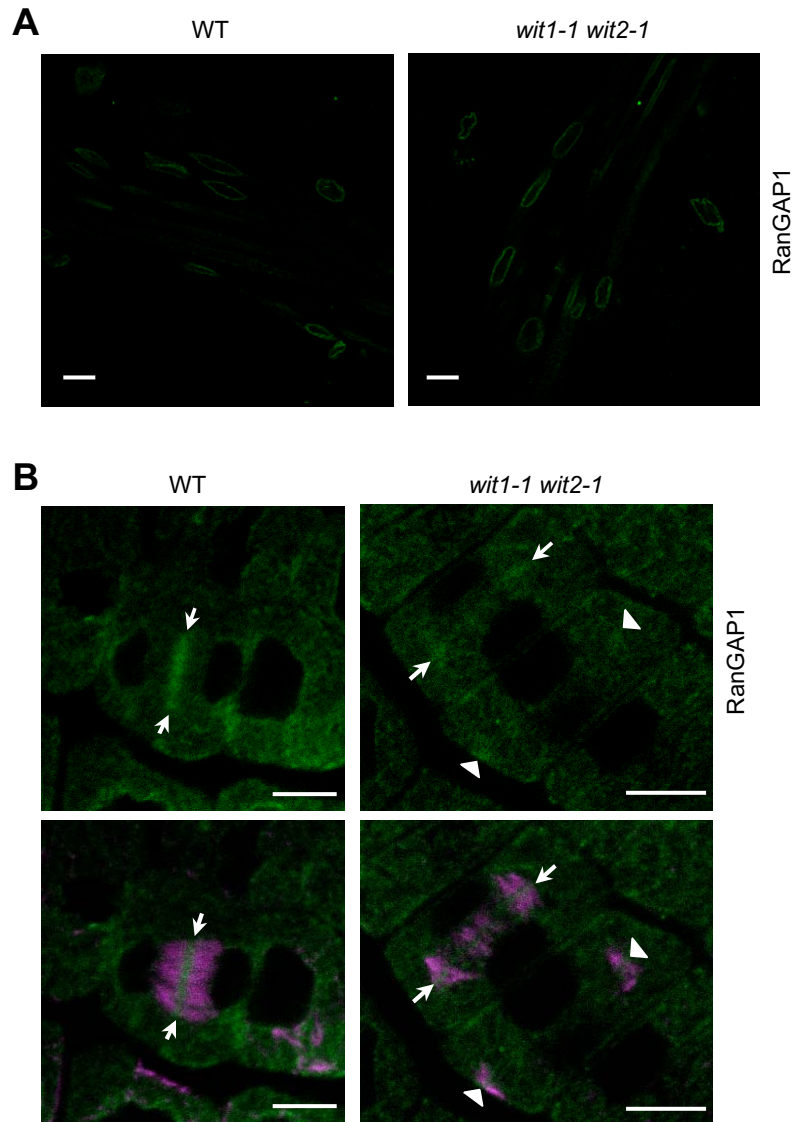

**Supplemental Figure 2. RanGAP1 is targeted to the NE in the differentiation zone and during cytokinesis in *wit1-1 wit2-1* roots.** (A) Immunofluorescence localization of RanGAP1 in differentiated cells of Arabidopsis wild-type (WT) and the *wit1-1 wit2-1* double mutant. All scale bars: 10  $\mu$ m. (B) Double immunofluorescence localization of RanGAP1 (green) and  $\alpha$ -tubulin (magenta) in the root tip cells of Arabidopsis wild-type (WT) and *wit1-1 wit2-1*. Arrows and arrowheads are depicting the cell plate during early and late stage of cytokinesis, respectively. All scale bars: 10  $\mu$ m.

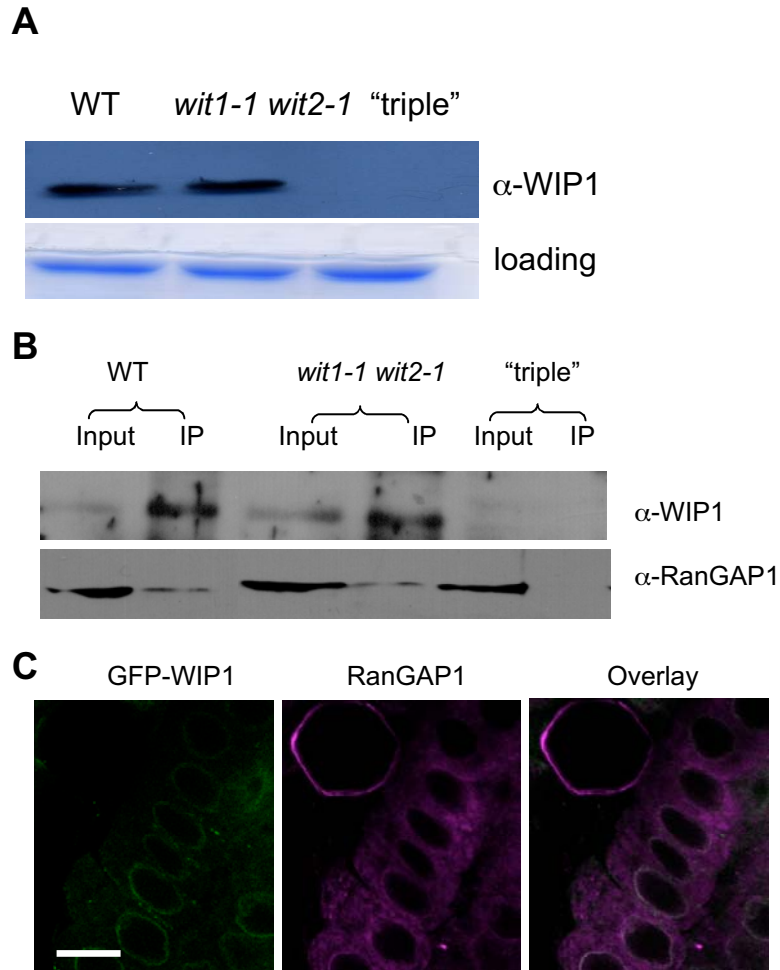

**Supplemental Figure 3. The fate of WIP1 in *wit1-1 wit2-1*.**

(A) WIP1 protein level is not changed in the *wit1-1 wit2-1* double mutant. Protein extracts from wild-type (WT), *wit1-1 wit2-1* double mutant and *wip1-1 wip2-1 wip3-1* triple mutant (“triple”) were probed with the anti-WIP1 antibody. A coomassie brilliant blue stained replica gel is shown as loading control. (B) The interaction between endogenous WIP1 and RanGAP1 in Arabidopsis is not changed in *wit1-1 wit2-1*. Samples immunoprecipitated from WT, *wit1-1 wit2-1* and *wip1-1 wip2-1 wip3-1* (“triple”) with the anti-WIP1 antibody, were probed with the anti-WIP1 antibody and co-immunoprecipitated RanGAP1 was detected with the anti-RanGAP1 antibody. The *wip1-1 wip2-1 wip3-1* triple mutant (“triple”) serves as a negative control for WIP1 immunoprecipitation. (C) Double immunofluorescence localization of GFP-WIP1 (green) and RanGAP1 (magenta) in the root tip cells of *wit1-1 wit2-1* transformed with GFP-WIP1. All scale bars: 10  $\mu$ m.

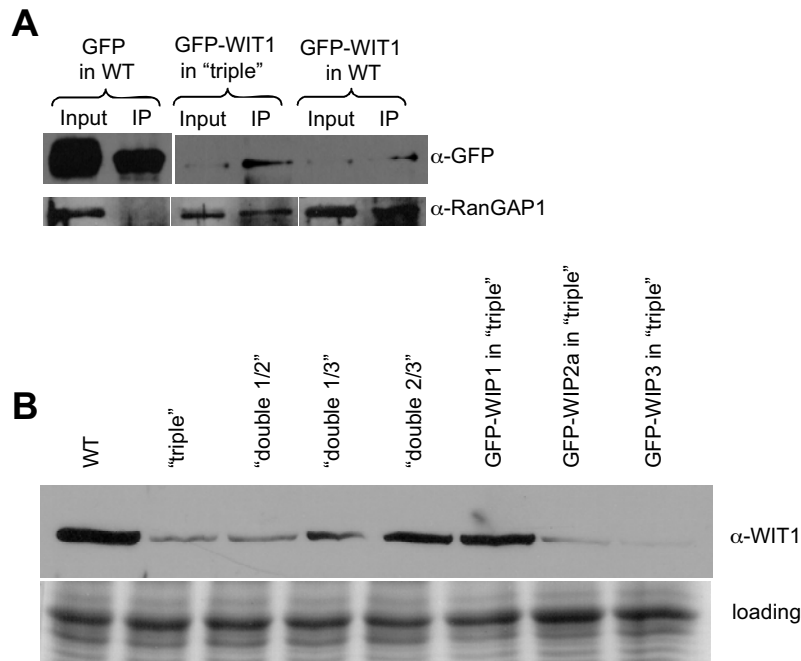

**Supplemental Figure 4. WIT1-RanGAP1 interaction in *wip1-1 wip2-1 wip3-1* and WIT1 abundance in different WIP double mutant combinations.**

(A) Overexpressed GFP-WIT1 interacts with RanGAP1 in the *wip1-1 wip2-1 wip3-1* triple mutant. Samples were immunoprecipitated with anti-GFP from Arabidopsis wild-type (WT) seedlings expressing GFP or GFP-WIT1 or from *wip1-1 wip2-1 wip3-1*/GFP-WIT1 seedlings (top lane) and were probed with the anti-RanGAP1 antibody (bottom lane). (B) WIT1 level is reduced in the *wip1-1 wip2-1* and *wip1-1 wip3-1* double mutants and in *wip1-1 wip2-1 wip3-1* expressing GFP-WIP1, GFP-WIP2a or GFP-WIP3. Protein extracts from wild-type (WT); *wip1-1 wip2-1* ("double 1/2"), *wip1-1 wip3-1* ("double 1/3") and *wip2-1 wip3-1* ("double 2/3") double mutants; *wip1-1 wip2-1 wip3-1* triple mutant ("triple") expressing GFP-WIP1, GFP-WIP2a or GFP-WIP3 were probed with anti-WIT1 antibody. A coomassie brilliant blue stained replica gel is shown at the bottom as loading control.

**Supplemental Table 1. Selected organ-specific expression profiles of *WIT1* and *WIT2* from Genevestigator expression analysis.**

|             | seedling | inflorescence | rosette | roots | root tip | elongation zone | root hair zone |
|-------------|----------|---------------|---------|-------|----------|-----------------|----------------|
| <i>WIT1</i> | 656      | 1192          | 585     | 1248  | 1480     | 1558            | 1520           |
| <i>WIT2</i> | 202      | 167           | 237     | 241   | 65       | 215             | 119            |

Complete expression profile of *WIT1* is available in

<https://iii.genevestigator.ethz.ch/at/index.php?page=tair&option=atlas&agi=AT5g11390>

and complete expression profile of *WIT2* is available in

<https://iii.genevestigator.ethz.ch/at/index.php?page=tair&option=atlas&agi=AT1g68910>

**Supplemental Table 2. List of plasmids used in this study.**

|                 |                                                                              |                     |
|-----------------|------------------------------------------------------------------------------|---------------------|
| pDEST22         | N-terminal fusion with GAL4 AD; TRP1 Amp <sup>R</sup>                        | Invitrogen          |
| pDEST32         | N-terminal fusion with GAL4 BD; LEU2 Gm <sup>R</sup>                         | Invitrogen          |
| TOPO pENTR      | Blunt-end PCR product entry vector; Kan <sup>R</sup>                         | Invitrogen          |
| pK7WGF2,0       | N-terminal fusion with GFP; Sp <sup>R</sup> Kan <sup>R</sup>                 | Karimi et al., 2002 |
| pH2GW7,0        | Overexpression or antisense; Sp <sup>R</sup> Hyg <sup>R</sup>                | Karimi et al., 2002 |
| pEarleyGate 202 | N-terminal fusion with FLAG; Kan <sup>R</sup> Bar <sup>R</sup>               | Earley et al., 2006 |
| NTAPi           | N-terminal fusion with TAP tag; Sp <sup>R</sup> Bar <sup>R</sup>             | Rohila et al., 2004 |
| pDEST17         | N-terminal fusion with His; Amp <sup>R</sup>                                 | Invitrogen          |
| pIM1021         | <i>WIT1</i> in TOPO pENTR; Kan <sup>R</sup>                                  | This study          |
| pIM1022         | N- <i>WIT1</i> (AA 1-660) in TOPO pENTR; Kan <sup>R</sup>                    | This study          |
| pIM1023         | TMD- <i>WIT1</i> (AA 661-703) in TOPO pENTR; Kan <sup>R</sup>                | This study          |
| pIM1024         | <i>WIT1</i> in pK7WGF2,0; Sp <sup>R</sup> Kan <sup>R</sup>                   | This study          |
| pIM1025         | N- <i>WIT1</i> (AA 1-660) in pK7WGF2,0; Sp <sup>R</sup> Kan <sup>R</sup>     | This study          |
| pIM1026         | TMD- <i>WIT1</i> (AA 661-703) in pK7WGF2,0; Sp <sup>R</sup> Kan <sup>R</sup> | This study          |
| pIM1027         | <i>WIT1</i> in pDEST22; TRP1 Amp <sup>R</sup>                                | This study          |
| pIM1028         | <i>WIT1</i> in pDEST32; LEU2 Gm <sup>R</sup>                                 | This study          |
| pIM1029         | <i>WIT1</i> in pEarleyGate 202; Kan <sup>R</sup> Bar <sup>R</sup>            | This study          |
| pIM1030         | <i>WPP2</i> in NTAPi; Sp <sup>R</sup> Bar <sup>R</sup>                       | This study          |
| pIM1031         | N- <i>WIT1</i> (AA 1-317) in pDEST17; Amp <sup>R</sup>                       | This study          |
| pIM1032         | <i>WIP1</i> in pH2GW7,0; Sp <sup>R</sup> Hyg <sup>R</sup>                    | This study          |
| pIM2054         | <i>WPP1</i> in pDEST32; LEU2 Gm <sup>R</sup>                                 | Xu et al., 2007     |
| pIM2058         | <i>WPP2</i> in pDEST32; LEU2 Gm <sup>R</sup>                                 | Xu et al., 2007     |
| pIM2061         | <i>WPP3</i> in pDEST32; LEU2 Gm <sup>R</sup>                                 | Xu et al., 2007     |
| pIM2002         | <i>WIP1</i> in pK7WGF2,0; Sp <sup>R</sup> Kan <sup>R</sup>                   | Xu et al., 2007     |
| pIM2015         | <i>WIP2a</i> in pK7WGF2,0; Sp <sup>R</sup> Kan <sup>R</sup>                  | Xu et al., 2007     |
| pIM2009         | <i>WIP3</i> in pK7WGF2,0; Sp <sup>R</sup> Kan <sup>R</sup>                   | Xu et al., 2007     |
| pIM2072         | <i>RanGAP2</i> in pK7WGF2,0; Sp <sup>R</sup> Kan <sup>R</sup>                | Xu et al., 2007     |
| pIM2109         | <i>RanGAP1</i> in pFGC1008; Cm <sup>R</sup> Hyg <sup>R</sup>                 | Jeong et al., 2005  |
| pIM2116         | <i>RanGAP1</i> (WPP/AAP) in pFGC1008; Cm <sup>R</sup> Hyg <sup>R</sup>       | Jeong et al., 2005  |

Abbreviations: Amp<sup>R</sup>, ampicillin resistance; BD, DNA-binding domain; AD, activation domain; Kan<sup>R</sup>, kanamycin resistance; Sp<sup>R</sup>, spectinomycin resistance; Hyg<sup>R</sup>, hygromycin resistance; Bar<sup>R</sup>, Basta resistance; Gm<sup>R</sup>, gentamicin resistance; Cm<sup>R</sup>, chloramphenicol resistance.
